# Supplementary material
Source: PubMed Central journal article supplement (PMC3281685)
Supplement: supp_M111.323337_jbc.M111.323337-8.pdf [file supp_M111.323337_jbc.M111.323337-8.pdf]

Supplemental Figure 8

A

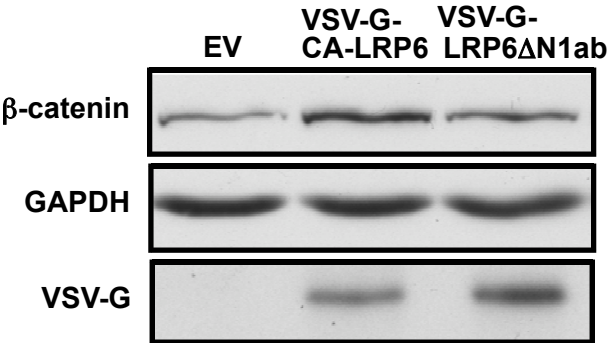

B

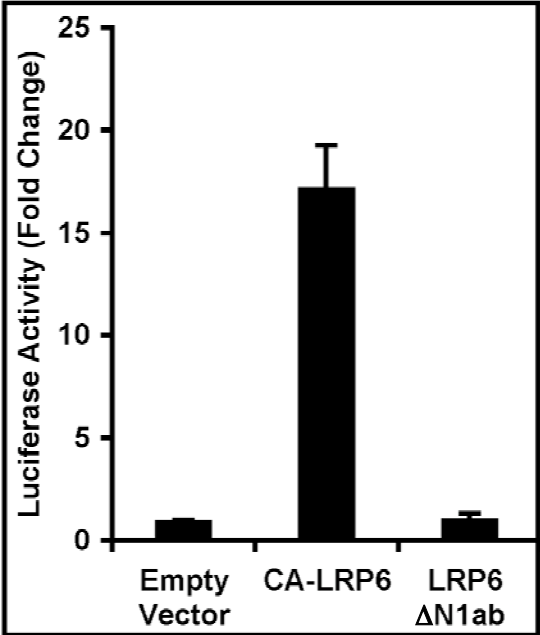

**Supplemental Figure S8. Constitutively active LRP6 activates downstream Wnt signaling.**

Expression of VSV-G tagged constitutively active LRP6 (VSV-G-CA-LRP6), but not the nonfunctional, unphosphorylatable VSV-G-LRP6 $\Delta$ N1ab fragment, elevated  $\beta$ -catenin levels (A) and activated the TOPFLASH Wnt reporter (B) in 293T OT Luciferase cells. Error bars represent standard error of the mean.
